# Supplementary material for: Gold and Cobalt Oxide Nanoparticles Modified Poly-Propylene Poly-Ethylene Glycol Membranes in Poly (ε-Caprolactone) Conduits Enhance Nerve Regeneration in the Sciatic Nerve of Healthy Rats
Source: MDPI journal article supplement (doi:10.3390/ijms22137146), 2021-07-01
Supplement: s1 [file s1]

## Project 1: AuPPEG membrane

22/02/2021 12:44:41

| Element | Weight% | Atomic% |
|---------|---------|---------|
| C K     | 76.12   | 91.70   |
| Cl K    | 19.56   | 7.98    |
| Au M    | 4.32    | 0.32    |
| Totals  | 100.00  |         |

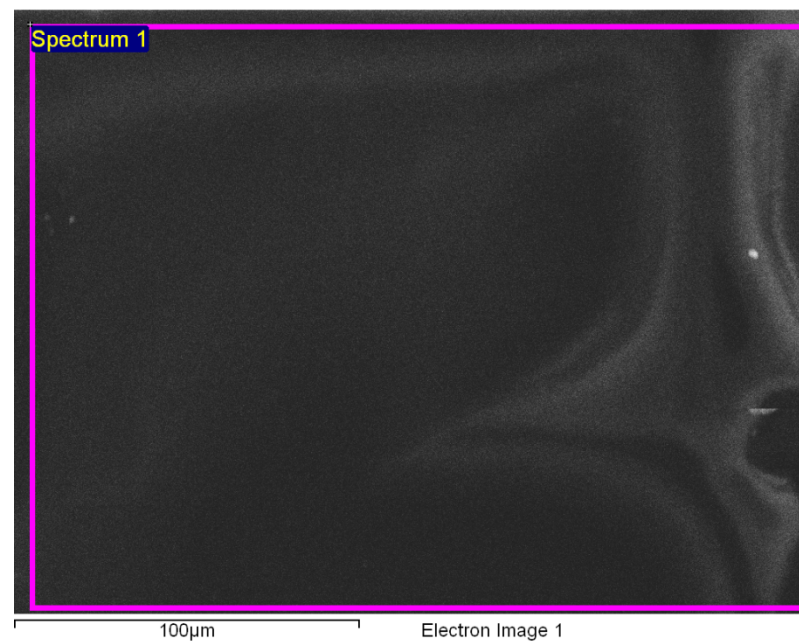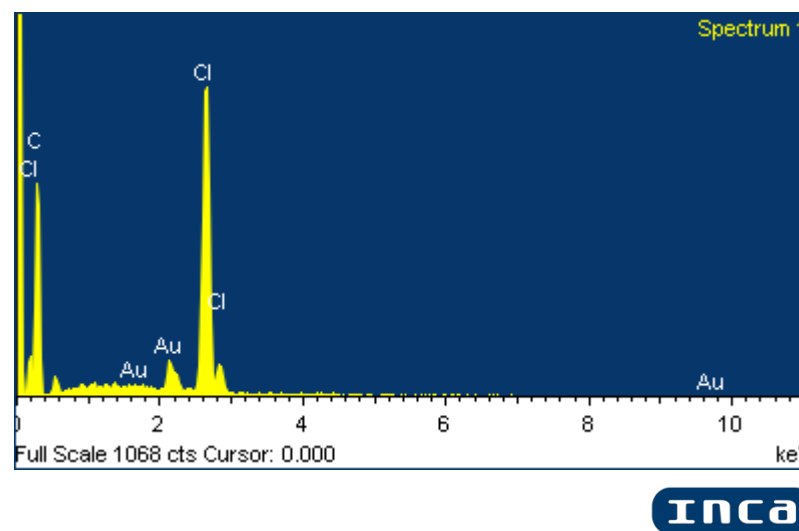

Comment: The analysis of the surface of AuPPEG membrane

| Element | Weight% | Atomic% |
|---------|---------|---------|
| C K     | 71.01   | 76.91   |
| O K     | 27.93   | 22.71   |
| Cl K    | 1.00    | 0.37    |
| Co K    | 0.06    | 0.01    |
| Totals  | 100.00  |         |

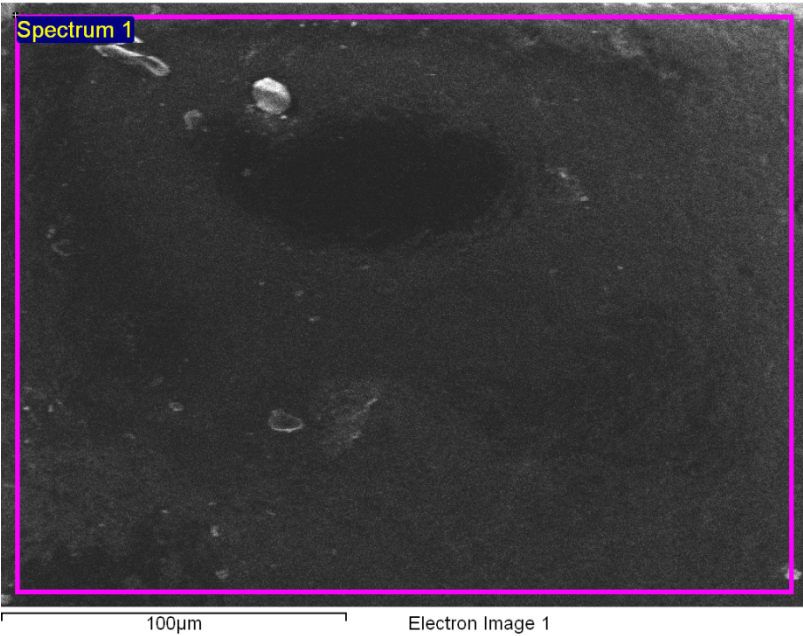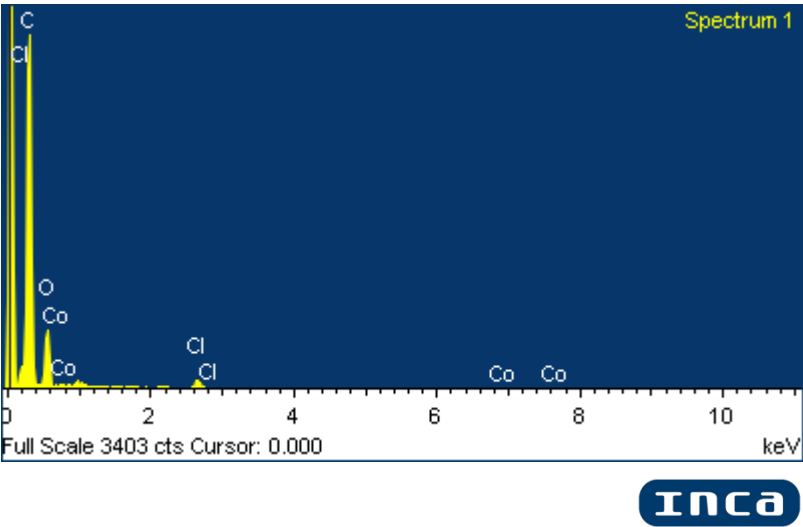

Comment: The analysis of the surface of AuCoOPPEG membrane
